# Supplementary material
Source: Springer Nature journal article supplement (https://www.springermedizin.de/resource/supplementary/12879_2011_1541_MOESM5_ESM.pdf/9442762)

Colony forming units/mL after 2 hours exposure

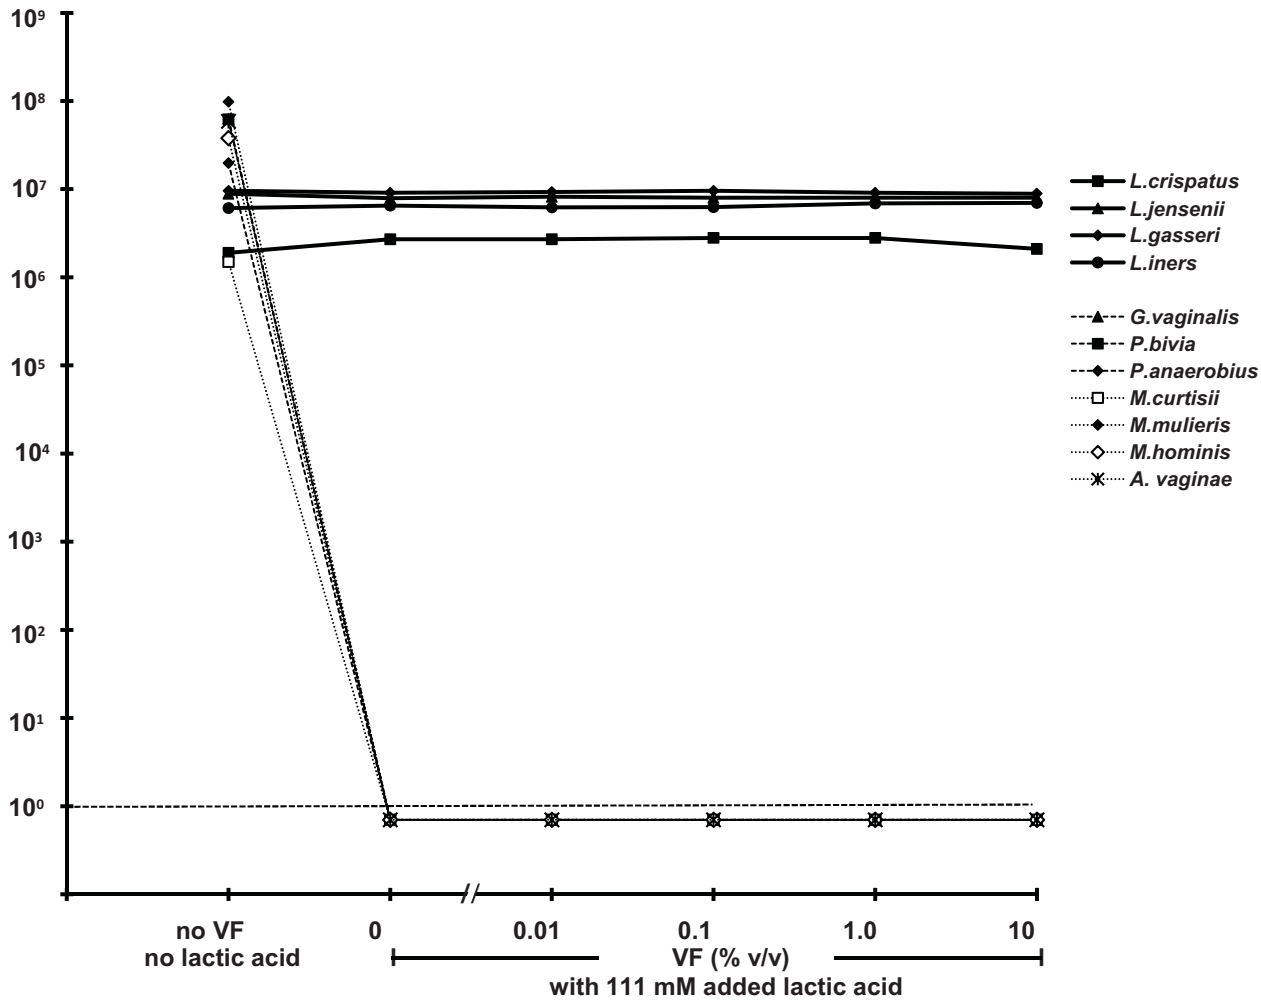

Supplement: MOESM5 [file 9442762]
